# Supplementary material
Source: PubMed Central journal article supplement (PMC2713555)
Supplement: supp_M805690200_JBC_M8_05690_supplement_march09.pdf [file supp_M805690200_JBC_M8_05690_supplement_march09.pdf]

# SUPPLEMENTARY MATERIAL

## SPECTROSCOPIC INSIGHTS INTO THE OXYGEN-TOLERANT MEMBRANE-ASSOCIATED [NiFe]-HYDROGENASE OF *RALSTONIA* *EUTROPHA* H16

Miguel Saggu<sup>1</sup>, Ingo Zebger<sup>1†</sup>, Marcus Ludwig<sup>2</sup>, Oliver Lenz<sup>2</sup>, Bärbel Friedrich<sup>2</sup>, Peter Hildebrandt<sup>1</sup>  
and Friedhelm Lenzian<sup>1†</sup>

From the <sup>1</sup>Technische Universität Berlin, Institut für Chemie, PC14, Straße des 17. Juni 135, D-10623 Berlin, Germany, and the <sup>2</sup>Institute of Biology, Department of Microbiology, Humboldt-Universität zu Berlin, Berlin, Germany.

Running title: Spectroscopy of membrane associated *Re* H16 MBH

†To whom correspondence should be addressed: Tel.: +49-30-314-22489; Fax: +49-30-314-21122;

Email: f.lenzian@tu-berlin.de, ingo.zebger@tu-berlin.de

**TABLE S1**

**Spin-quantification of the signal intensity of the [3Fe4S] and Ni<sub>r</sub>-B center in *Re* H16 dimer in different preparations, obtained by double integration of the spectra.**

| Preparation                           | [3Fe4S] <sup>+</sup> <sup>a)</sup> | Ni <sub>r</sub> -B <sup>b)</sup> |
|---------------------------------------|------------------------------------|----------------------------------|
| H16 WT<br>mainly narrow signal        | 0.8                                | 0.13                             |
| H16 WT<br>mixed narrow / split signal | 1.82                               | 0.26                             |
|                                       | 1.47                               | 0.35                             |
|                                       | 1.21                               | 0.32                             |

<sup>a)</sup> The quantification refers to the complete [3Fe4S]<sup>+</sup>-signal (“narrow” plus “split” signal)

<sup>b)</sup> The amount of Ni<sub>r</sub>-B is within the experimental error in agreement with the FTIR data

**TABLE S2**

**EPR-detected paramagnetic centers in *Re* H16 (this work) compared with those from other [NiFe] hydrogenases and known or postulated magnetic interactions between these centers**

| Organism                  | <i>Re</i> H16<br>(this work)                                    | <i>Rm</i> CH34<br>(39)                                          | <i>Re</i> H16 old<br>work (38)                   | <i>A. aeolicus</i><br>(62)                       | <i>A. vinosum</i><br>(7;63;64)                                                    | <i>Dv</i> Miyazaki<br>F (18)                                                      |
|---------------------------|-----------------------------------------------------------------|-----------------------------------------------------------------|--------------------------------------------------|--------------------------------------------------|-----------------------------------------------------------------------------------|-----------------------------------------------------------------------------------|
| [FeS]<br>clusters         | split<br>[3Fe4S] <sup>+</sup>                                   | split<br>[3Fe4S] <sup>+</sup>                                   | split<br>[3Fe4S] <sup>+</sup>                    | split<br>[3Fe4S] <sup>+</sup>                    | split<br>[3Fe4S] <sup>+</sup>                                                     | unsplit<br>[3Fe4S] <sup>+</sup>                                                   |
|                           | coupled<br>[4Fe4S] <sup>1+</sup>                                | coupled<br>[4Fe4S] <sup>1+</sup>                                | coupled<br>[4Fe4S] <sup>1+</sup>                 | coupled<br>[4Fe4S] <sup>1+</sup>                 | coupled<br>[4Fe4S] <sup>1+</sup>                                                  | coupled<br>[4Fe4S] <sup>1+</sup>                                                  |
| paramagnetic<br>Ni states | Ni <sub>r</sub> -B, Ni <sub>a</sub> -C,<br>Ni <sub>a</sub> -L   | Ni <sub>r</sub> -B, Ni <sub>a</sub> -C,<br>Ni <sub>a</sub> -L   | Ni(III)<br>(Ni <sub>r</sub> -B)                  | Ni <sub>r</sub> -B,<br>Ni <sub>a</sub> -C        | Ni <sub>u</sub> -A, Ni <sub>r</sub> -B,<br>Ni <sub>a</sub> -C, Ni <sub>a</sub> -L | Ni <sub>u</sub> -A, Ni <sub>r</sub> -B,<br>Ni <sub>a</sub> -C, Ni <sub>a</sub> -L |
| magnetic<br>interactions  | [3Fe4S] <sup>+</sup> +<br>X <sup>ox</sup> <sup>a)</sup>         | Ni <sub>r</sub> -B +<br>[3Fe4S] <sup>+</sup>                    | -                                                | -                                                | [3Fe4S] <sup>+</sup> +<br>X <sup>ox</sup> <sup>b)</sup>                           | -                                                                                 |
|                           | Very weak<br>X <sup>ox</sup> <sup>a)</sup> + Ni <sub>r</sub> -B | Ni <sub>a</sub> -C/Ni <sub>a</sub> -L<br>+ [3Fe4S] <sup>0</sup> | -                                                | Ni <sub>a</sub> -C +<br>[4Fe4S] <sup>1+</sup>    | Ni <sub>a</sub> -C +<br>[4Fe4S] <sup>1+</sup>                                     | Ni <sub>a</sub> -C +<br>[4Fe4S] <sup>1+</sup>                                     |
|                           | [3Fe4S] <sup>0</sup> +<br>[4Fe4S] <sup>1+</sup>                 | [4Fe4S] <sup>1+</sup> +<br>[4Fe4S] <sup>1+</sup>                | [4Fe4S] <sup>1+</sup> +<br>[4Fe4S] <sup>1+</sup> | [4Fe4S] <sup>1+</sup> +<br>[4Fe4S] <sup>1+</sup> | [4Fe4S] <sup>1+</sup> +<br>[4Fe4S] <sup>1+</sup>                                  | [4Fe4S] <sup>1+</sup> +<br>[4Fe4S] <sup>1+</sup>                                  |
|                           |                                                                 |                                                                 |                                                  |                                                  |                                                                                   |                                                                                   |

<sup>a)</sup> X<sup>ox</sup> is postulated to be a proximal high potential [4Fe4S]<sup>3+</sup> cluster or a yet unknown additional high potential paramagnetic species (e.g. Fe<sup>3+</sup>) in the proximity of the proximal cluster.

<sup>b)</sup> Ni<sub>r</sub>-B, or a proximal [4Fe4S]<sup>3+</sup> cluster or an additional Fe<sup>3+</sup> were discussed as origin of X<sup>ox</sup>.

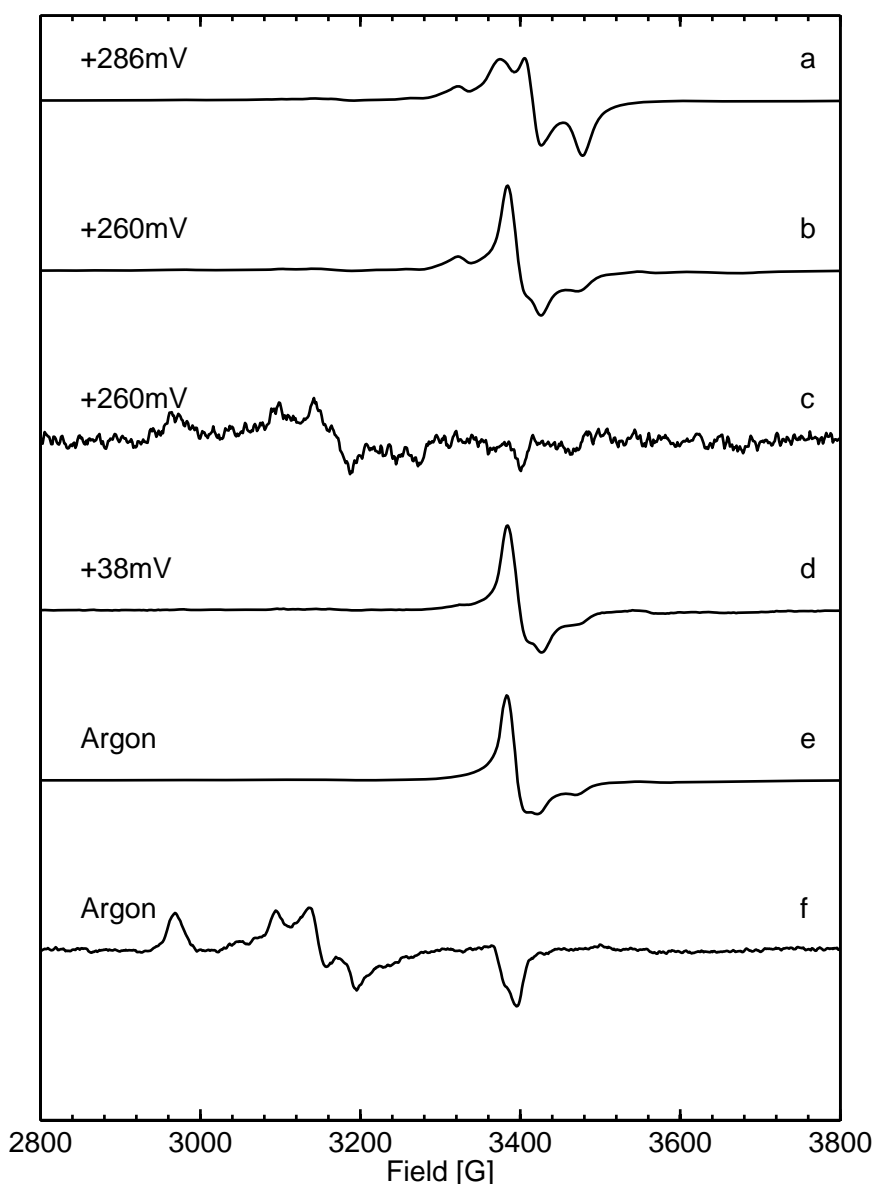

**Figure S1:** EPR spectra of solubilized dimeric MBH. Redox potentials had been adjusted in the samples, prior to freezing (see main paper).

(a) treated with DCIP, showing more “split”  $[3\text{Fe}_4\text{S}]^+$  signal,  $T = 20\text{ K}$ ; (b) as isolated, showing superimposed narrow and “split”  $[3\text{Fe}_4\text{S}]^+$  signal,  $T = 20\text{ K}$ ; (c) as isolated,  $T = 60\text{ K}$ , showing only  $\text{Ni}_r\text{-B}$ ; (d) treated with mercapto-EtOH, showing reduced “split”  $[3\text{Fe}_4\text{S}]^+$  signal intensities;  $T = 20\text{ K}$ ; (e) treated with argon,  $T = 20\text{ K}$ ; (f) treated with argon,  $T = 80\text{ K}$ , showing strong  $\text{Ni}_r\text{-B}$  signals.

Signals of  $\text{Ni}_r\text{-B}$  are only pronounced at higher temperatures (80 K) when the additional paramagnetic center, which gives rise to the “split”  $[3\text{Fe}_4\text{S}]^+$  signal, is reduced (trace f).

Experimental conditions: 1 mW microwave power; microwave frequency 9.56 GHz; 1 mT modulation amplitude, 12.5 kHz modulation frequency.

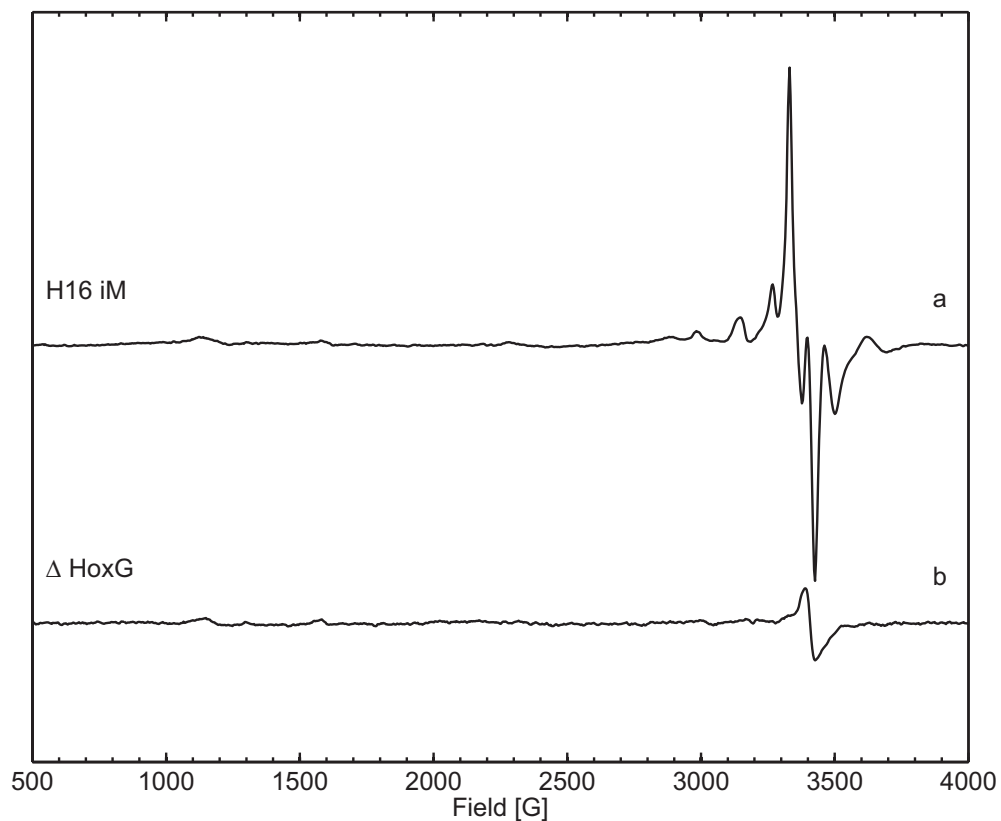

**Figure S2:** EPR spectra of inner membrane preparations from *Re* H16 at  $T = 20$  K. The signal intensity is normalized to the  $g = 6$  signal at 1100 Gauss, which might result from a heme-containing protein.

(a) as-isolated inner membrane containing the wild-type MBH trimer

(b) as-isolated membranes lacking MBH due to a genetic deletion of the gene *hoxG* for the MBH large subunit

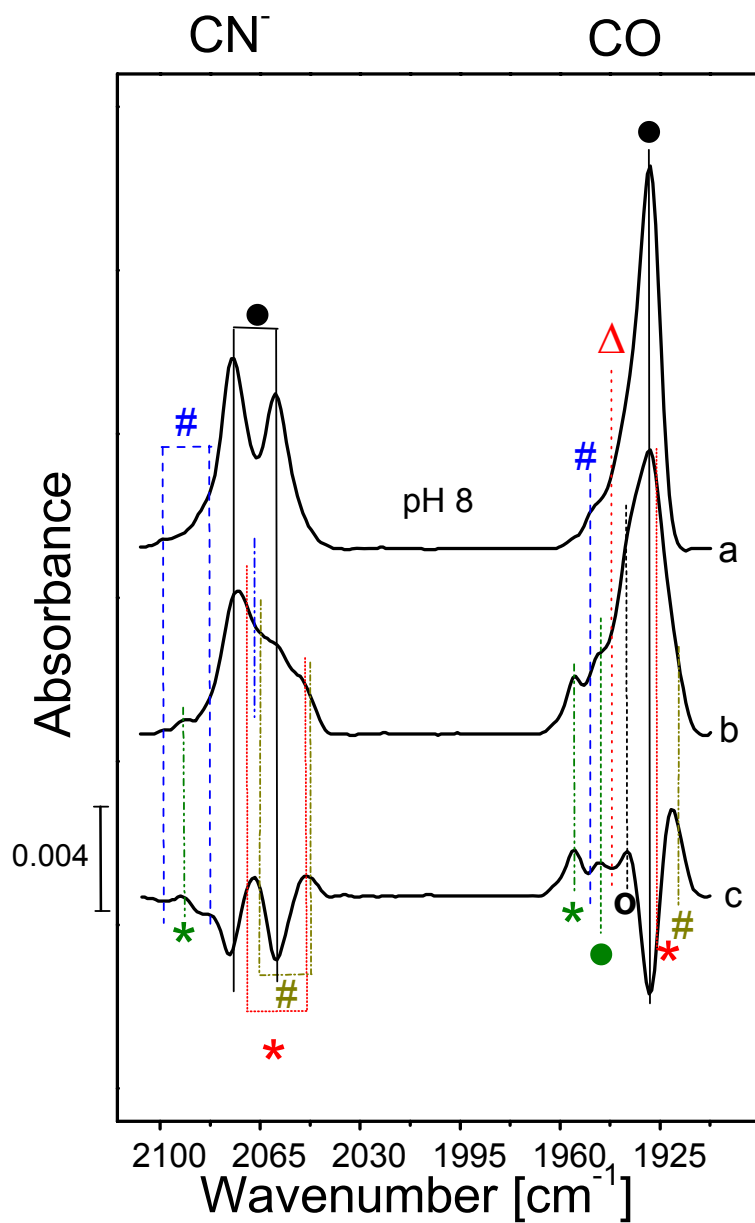

**Figure S3** FTIR spectra of the *Re* MBH, oxidized (as isolated) enzyme (a), the H<sub>2</sub>-reduced samples (1 bar H<sub>2</sub>) (b), and, the corresponding difference spectra (H<sub>2</sub>-reduced minus oxidized) (c) at pH 8. Definition of the symbols: Δ (red): Ni<sub>r/u</sub>-S; # (blue): Ni<sub>r</sub>-B; o: Ni<sub>r/a</sub>-S; • (black): Ni<sub>ia</sub>-S (only 20% active); \* (green): Ni<sub>a</sub>-C; • (green): Ni<sub>a</sub>-SR; \* (red): Ni<sub>a</sub>-SR'; # (yellow): Ni<sub>a</sub>-SR''

|              |   |                                                                |
|--------------|---|----------------------------------------------------------------|
| Ral_eut_HoxK | 1 | -----MVFETFYEVRRQGISRRSFLKYCSLTATSLGLGPSFLPQIAHAMET-KPRTPV     |
| Alc_hyd_HoxK | 1 | -----MIETFYEVRRQGISRRSFLKYCSLTATSLGLSPVFPVKIVHAMET-KPRTPV      |
| Ral_met_HoxK | 1 | -----METFYEIMRRKGISRRSFMKYCSLTATSLGLAPSFPVQIAHAMEN-KPRTPV      |
| Rho_cap_HupS | 1 | -----MSDIETFYDVMRRQGITRRSFMKFCSLTAAALGLGPSFVPKIAEAMET-KPRTPV   |
| Rhi_leg_HupS | 1 | -----MATAETFYDVIRRQGITRRSFTHKFCSLTAASLGFGPGAATAMAAEALET-KERVPV |
| Bra_jap_HupS | 1 | -----MGAATETFYSVIRRQGITRRSFHKFCSLTATSLGLPLAASRIANALET-KPRVPV   |
| Thi_ros_HupS | 1 | -----MPTTETYYEVRRQGITRRSFLKFCSLTATALGLSPTFAGKIAHAMET-KPRIPV    |
| Aqu_aeo_HyaA | 1 | -----METFWEVFKRHGVSRRDFLKFAITITGLMGLAPSMVPEVVRAMET-KPRVPV      |
| Esc_col_HyaA | 1 | -----MNNEETFYQAMRRQGVTRRSFLKYCSLAATSLGLGAGMAPKIAWALEN-KPRIPV   |
| Esc_col_HybO | 1 | -----MTGDNTLIHSHGINRRDFMKLCAALAATMGLSSKAAAEAESVTN-PQRPPV       |
| All_vin_HynS | 1 | -----PSV                                                       |
| Thi_ros_HynS | 1 | -MAARNPTDKTLGESLRERGVSRRGFLKFCATASMMALPPSMAPAIAAALEQ-AKRPSV    |
| Des_gig_HydA | 1 | -----MKFCTAVAVAMGMGPAFAPKVAEALTA-KKRPSV                        |
| Des_vul_HydA | 1 | MKISIGLGKEGVEERLAERGVSRDFLKFTAIAVTMGMGPAFAPEVARALMG-PRRPSV     |
| Des_bac_HysS | 1 | -----MSLSRREFVKLCSAGVAGLGISQIYHPGIVHAMTEGAKKAPV                |

**P P**

|              |    |                                                               |
|--------------|----|---------------------------------------------------------------|
| Ral_eut_HoxK | 53 | LWLHGLECTCCSESFIRSAHPLAKDVVLSMISLDYDDTLMAAAGHQAEAILLEEIMTKYKG |
| Alc_hyd_HoxK | 53 | LWLHGLECTCCSESFIRSAHPLAKDVVLSMISLDYDDTLMAAAGHQAEAILGEVMTKYKG  |
| Ral_met_HoxK | 52 | LWLHGLECTCCTEAFIRSAHPLAKDVVLSMISLDYDDTLMAAAGHQAEAILLEEIMTKYKG |
| Rho_cap_HupS | 55 | VVWHGLECTCCSESFIRSAHPLAKDVVLSMISLDYDDTLMAAAGHAAEAFAFEETIAKYKG |
| Rhi_leg_HupS | 55 | IWMHGLECTCCSESFIRSAHPLVKDVVLSMISLDYDDTIMAAAGHQAESILAETKEKYKG  |
| Bra_jap_HupS | 56 | IWMHGLECTCCSESFIRSAHPLVKDAVLSMISLDYDDTIMAAAGHQAEAILLEETRAKHKG |
| Thi_ros_HupS | 55 | VWLHGLECTCCSESFIRSAHPLVSDVILSMISLDYDILIMAAAGHQAEAILLEEVHRKHAG |
| Aqu_aeo_HyaA | 52 | LWIHGLECTCCSESFIRSATPLASDVVLSMISLEYDDTLMAAAGEAVEKHRERIIKEYWG  |
| Esc_col_HyaA | 55 | VWIHGLECTCCTESFIRSAHPLAKDVILSLISLDYDDTLMAAAGTQAEVFEEDIIITQYNG |
| Esc_col_HybO | 52 | IWIGAQECTGCTESLLRATHPTVENLVLETISLEYHEVLSAAFHQVEENKHNALKEYKG   |
| All_vin_HynS | 4  | VWLSFQECTGCTESLTRAHPTLEDLILDFISLDYHHTLQAAASGEAAEAARLQAMDENRG  |
| Thi_ros_HynS | 59 | IWLSFQECTGCTESLTRSHAPTLEDLILDVILSDYHHTLQAAAGDAAEHAREQAMAANPG  |
| Des_gig_HydA | 34 | VYLHNAECTGCTESLLRTVDPYVDELILDVISM DYHETLMAGAGHAVEEALHEAIKG--- |
| Des_vul_HydA | 60 | VYLHNAECTGCTESVLRAFEPIYIDTLILDVILSDYHETIMAAAGDAAEAALQAVNSPH-  |
| Des_bac_HysS | 43 | IWVQGGCTGCTSVSLLNAVHPRIKEILLDVISLEFHPTVMASEGEMALAHMYEIAEKFNK  |

**P**

|              |     |                                                                          |
|--------------|-----|--------------------------------------------------------------------------|
| Ral_eut_HoxK | 113 | NYILAVEGNPP-LNQDGMSCIIIGG-----RPFIEQLKYVAKDAKAIISWGS <sup>C</sup> ASW    |
| Alc_hyd_HoxK | 113 | NYILAVEGNPP-LNQDGMSCIIIGG-----KPFIDQLRHVAKDAKAIISWGS <sup>C</sup> ASW    |
| Ral_met_HoxK | 112 | QYILAVEGNPP-LNEDGMFCIQSG-----KPFIDKLKHVAKDAKAIIAWGS <sup>C</sup> ASW     |
| Rho_cap_HupS | 115 | NYILAVEGNPP-LNEDGMFCITGG-----KPFVEKLRHAAEGAKAIISWGA <sup>C</sup> ASY     |
| Rhi_leg_HupS | 115 | KYILAVEGNPP-LNEGGMFCIDGG-----KPFVEKLRHAAEGAKAIIAWGA <sup>C</sup> ASW     |
| Bra_jap_HupS | 116 | QYILAVEGNPP-LNEGGMFCIDGG-----KPFVEKLRHAAEGAKAIIAWGA <sup>C</sup> ASW     |
| Thi_ros_HupS | 115 | NYILAVEGNPP-LNQDGMSCIIIGG-----RPFLEQLLEMADSCKAVISWGS <sup>C</sup> ASW    |
| Aqu_aeo_HyaA | 112 | NYILAVEGNPP-LGEDGMYCIIIGG-----RPFVEILKESAEGAKAVIAWGS <sup>C</sup> ASW    |
| Esc_col_HyaA | 115 | KYILAVEGNPP-LGEQGMFCISSG-----RPFIEKLRHAAEGAKAIIAWGS <sup>C</sup> ASW     |
| Esc_col_HybO | 112 | QYVLVVDGSIPLKDNGIYCMVAG-----EPIVDHIRKAAEGAAAIIAIGS <sup>C</sup> ASW      |
| All_vin_HynS | 64  | QYLVIVDGSIPGPDNPGFSTVAG-----HSNYSILMETVEHAAAVIIVGT <sup>C</sup> AAF      |
| Thi_ros_HynS | 119 | EYLVIVDGSIPGPDNPGYSTVAG-----HSNYAMLVETVNAAVIIVGT <sup>C</sup> ATF        |
| Des_gig_HydA | 91  | DFVCVIEGGIP-MGDGGYWGKVGR-----RNMYDICAIVAPKAKAVIAIGT <sup>C</sup> ATY     |
| Des_vul_HydA | 119 | GFIIVVEGGIP-TAANGIYKQVAN-----HTMLDICSRLPKAQAVIAYGT <sup>C</sup> ATF      |
| Des_bac_HysS | 103 | NFFLLVEGAIP-TAKEGRYCVGETLDAKGGHHEVTMMELIRDLAPKSLATVAVGT <sup>C</sup> SAY |

**P**

|              |     |                                                                            |
|--------------|-----|----------------------------------------------------------------------------|
| Ral_eut_HoxK | 162 | GCVQAAKNPTQATPVHKVIT----DKPIIKVPG <sup>C</sup> PPPIAEVMTG-----VITYMLTFDR   |
| Alc_hyd_HoxK | 162 | GCVQAAKANPTQATPIHKVIT----DKPIIKVPG <sup>C</sup> PPPIAEVMTG-----VITYMLTFDR  |
| Ral_met_HoxK | 161 | GCVQAAKNPTQATPIHKVIT----DKPIIKVPG <sup>C</sup> PPPIPEVMTG-----VITYMLTFDR   |
| Rho_cap_HupS | 164 | GCVQAAAPNPTQATPVHKVIT----DKPIIKVPG <sup>C</sup> PPPIAEVMTG-----VITYMLTFDR  |
| Rhi_leg_HupS | 164 | GCVQAAKNPTQATPIDKVIL----DKPIIKVPG <sup>C</sup> PPPIAEVMTG-----VVTFITTFGK   |
| Bra_jap_HupS | 165 | GCVQAAKNPTQATPIDKVIT----NKPIIKVPG <sup>C</sup> PPPIAEVMTG-----VVTFITTFGK   |
| Thi_ros_HupS | 164 | GCVQAARPNPTQATPVHEVIR----DKPVIKVPV <sup>C</sup> PPPIAEVMTG-----VLTYYILTFDR |
| Aqu_aeo_HyaA | 161 | GCVQAAKNPTTAVPIDKVIK----DKPIIKVPG <sup>C</sup> PPPIAEVMTG-----VIMYMLVDFDR  |
| Esc_col_HyaA | 164 | GCVQAARPNPTQATPIDKVIT----DKPIIKVPG <sup>C</sup> PPPIPDVMSA-----IITYMVTFDR  |
| Esc_col_HybO | 161 | GGVAAAGVNPTGAVSLQEVLP----GKTVINIPG <sup>C</sup> PPPNHNFLA-----TVAHIITYGK   |
| All_vin_HynS | 114 | GGLPQARPNTGAMSVMDLVR----DKPVINVPV <sup>C</sup> PPPIPMVITG-----VIAHYLTFGR   |
| Thi_ros_HynS | 169 | GGLPGANPNPTGAMSVMDLVK----DKPVINVSG <sup>C</sup> PPPIPMVITG-----VIAHYLTFGR  |
| Des_gig_HydA | 140 | GGVQAAKNPTGTVGVNEALGKL--GVKAINIAG <sup>C</sup> PPPNPMNVFG-----TVVHLLT-KG   |

|              |     |                                              |          |                            |                                     |                                      |   |                  |
|--------------|-----|----------------------------------------------|----------|----------------------------|-------------------------------------|--------------------------------------|---|------------------|
| Des_vul_HydA | 168 | GGVQAAKPNPTGAKGVNDALKHL--GVKAINIAG           | C        | PPNPYNLVG-----TIVYYLKNKA   |                                     |                                      |   |                  |
| Des_bac_HysS | 162 | GGIPAAEGNVTGSKSVRDFFADEKIEKLLVNVPG           | C        | PPHPDWMVGTLVAAWSHVLPNTEHP  |                                     |                                      |   |                  |
|              |     |                                              | <b>D</b> | <b>D</b>                   |                                     |                                      |   |                  |
| Ral_eut_HoxK | 212 | IPELDRQGRPKMFYSQRI                           | HDK      | CYRRPHFDAGQFVEEWDDESARKGF  | C                                   | LYKMG                                | C | KGPTTYN          |
| Alc_hyd_HoxK | 212 | FPELDRQGRPKMFYSQRI                           | HDK      | CYRRPHFDAGQFVESWDDDESARKGY | C                                   | LYKVG                                | C | KGPTTYN          |
| Ral_met_HoxK | 211 | IPELDRQGRPKMFYSQRI                           | HDK      | CYRRPHFDAGQFVEAWDDDSARKGY  | C                                   | LYKVG                                | C | KGPTTYN          |
| Rho_cap_HupS | 214 | MPELDRQGRPAMFYSQRI                           | HDK      | CYRRPHFDAGQFVEHWDDDENARKGY | C                                   | LYKMG                                | C | KGPTTYN          |
| Rhi_leg_HupS | 214 | LPELDRQGRPKMFYSQRI                           | HDK      | CYRRPHFDAGQFVEEWDDEGARKGY  | C                                   | LYKMG                                | C | KGPTTYN          |
| Bra_jap_HupS | 215 | LPELDRQGRPKMFYSQRI                           | HDK      | CYRRPHFDAGQFVEEWDDEAARKGY  | C                                   | LYKMG                                | C | KGPTTYN          |
| Thi_ros_HupS | 214 | LPELDRQGRPLMFYQRI                            | HDK      | CYRRPHFDAGQFVESWDDDEGARRGY | C                                   | LYKVG                                | C | KGPTTYN          |
| Aqu_aeo_HyaA | 211 | IPPLDSQGRPKMFYGNRI                           | HDT      | CYRRSFFNAGQFVEQFDDEGAKKGW  | C                                   | LYKVG                                | C | RGPTTYN          |
| Esc_col_HyaA | 214 | LPDVDRMGRPLMFYQRI                            | HDK      | CYRRPHFDAGQFVQSWDDDAARKGY  | C                                   | LYKMG                                | C | KGPTTYN          |
| Esc_col_HybO | 211 | PPKLDKRNPTFAYGRLI                            | HEH      | CERRPHFDAGRFAGEFGDEGHREGW  | C                                   | LYHLG                                | C | CKGPETYG         |
| All_vin_HynS | 164 | LPEVDGYGRPLAFYQSI                            | HDR      | CYRRPFYDKGLFAESFDDEGAKQGW  | C                                   | LYRLG                                | C | CKGPPTYN         |
| Thi_ros_HynS | 219 | LPELDAYNRPMAFFGQSI                           | HDR      | CYRRPFYDKGLFAKTFDDEGARLGW  | C                                   | LYELG                                | C | CKGPPTYN         |
| Des_gig_HydA | 191 | MPELDRQGRPVMFFGETV                           | HDN      | CPRPKHFEAGEFATSFGSPEAKKG   | C                                   | LYELG                                | C | CKGPPTYN         |
| Des_vul_HydA | 220 | APELDSLNRPTMFFGQTV                           | HEQ      | CPRLPHFADAGEFAPSFESEEARKGW | C                                   | LYELG                                | C | CKGPVTMN         |
| Des_bac_HysS | 222 | LPELDDDRPLLFFGDNI                            | HEN      | CPLYLDKYDNSEFAETFTKPG----- | C                                   | KAELG                                | C | CKGPSTYA         |
|              |     |                                              | <b>M</b> | <b>M</b>                   | <b>M</b>                            | <b>M</b>                             |   |                  |
| Ral_eut_HoxK | 272 | ACSTTRWNEGT-SFPIQSGHG                        | C        | IG                         | C                                   | SED--GFWDKGSFYDRLT                   | G | ISQFG--VEANADKIG |
| Alc_hyd_HoxK | 272 | ACSTTRWNGGT-SFPIQSGHG                        | C        | IG                         | C                                   | SED--GFWDKGSFYSRLTNIHQFG--           | I | EANADSVG         |
| Ral_met_HoxK | 271 | ACSTVQWNEGT-SFPIKAGHG                        | C        | IG                         | C                                   | SED--GFWDKGSFYDRLTDIHAFG--           | I | EANADQIG         |
| Rho_cap_HupS | 274 | ACSTVPLERRR-HFPIQSGHG                        | C        | IG                         | C                                   | SED--GFWDQGSFYDRLTTIKQFG--           | I | EATADQIG         |
| Rhi_leg_HupS | 274 | ACSTVRWNGGV-SFPIQSGHG                        | C        | IG                         | C                                   | SED--GFWDNGSFYDRLTNIHQFG--           | I | EANADKVG         |
| Bra_jap_HupS | 275 | ACSTVRWNGGV-SFPIQSGHG                        | C        | IG                         | C                                   | SED--GFWDKGSFYDRLTNIKQFG--           | I | EKNADQIG         |
| Thi_ros_HupS | 274 | ACSTIRWNGGV-SFPIQSGHG                        | C        | IG                         | C                                   | SED--GFWDKGSFYQHVTDTHAFG--           | I | EANADRTG         |
| Aqu_aeo_HyaA | 271 | SCGNMRWYNGL-SYPIQSGHG                        | C        | IG                         | C                                   | CAEN--NFDNGPFYERIGIIPVPG--           | I | ESKADKVG         |
| Esc_col_HyaA | 274 | ACSSTRWNDGV-SFPIQSGHG                        | C        | IG                         | C                                   | CAEN--GFWDRGSFYSRVVDIPQMG--          | T | HSTADTVG         |
| Esc_col_HybO | 271 | NCSTLQFCDVGGVWPVAIGHPC                       | Y        | C                          | NEEGIGFHKGIHQLANVENQTPRSQKPDVNAKEGG |                                      |   |                  |
| All_vin_HynS | 224 | ACATMKWNDGT-SWPVEAGHP                        | C        | IG                         | C                                   | SEP--QFWDAGGFYEPVSVPLTLGPATLLGAGAAG  |   |                  |
| Thi_ros_HynS | 279 | ACATMRWNDGT-SWPVEAGHP                        | C        | IG                         | C                                   | SEP--RFWDAGGFYNTVSVVPTSASGVNVLAAGAAG |   |                  |
| Des_gig_HydA | 251 | NCPKQLFNQVN--WPVQAGHP                        | C        | IG                         | C                                   | SEP--NFDWLYSPFYSA-----               |   |                  |
| Des_vul_HydA | 280 | NCPKIKFNQTN--WPVDAGHP                        | C        | IG                         | C                                   | SEP--DFWDAMTPFYQN-----               |   |                  |
| Des_bac_HysS | 277 | DCAKRRWNGI-NWCVEN-AV                         | C        | IG                         | C                                   | VEP--DFPDGKSPFYVAE-----              |   |                  |
| Ral_eut_HoxK | 327 | GTASVVVGAAVTAHAAASAIKRASKK                   |          |                            |                                     | NETSGSEH-----                        |   |                  |
| Alc_hyd_HoxK | 327 | VTAVGVVGAATAAHAASAIKRARHKDAAQDTAATQK         |          |                            |                                     | -----                                |   |                  |
| Ral_met_HoxK | 326 | GTAAGVVGAAVAHAASAIKRVKRDNNARKPDASTPANH       |          |                            |                                     | -----                                |   |                  |
| Rho_cap_HupS | 329 | WTATGLVGAAVAHAASVVKRAQKK--NEEA               |          |                            |                                     | -----                                |   |                  |
| Rhi_leg_HupS | 329 | MTAAGVVGGATAAHAAVTAVKRLITK--REKADA           |          |                            |                                     | -----                                |   |                  |
| Bra_jap_HupS | 330 | MVAAGAVGAAVAHAAVTAVKRLATK--REDADHNS          |          |                            |                                     | -----                                |   |                  |
| Thi_ros_HupS | 329 | IAVATRRGAHRAHAASVVKRVQOK--KEEDQS             |          |                            |                                     | -----                                |   |                  |
| Aqu_aeo_HyaA | 326 | AIAAAAAAGGAIIHGIASKIRKSGEK--EE               |          |                            |                                     | -----                                |   |                  |
| Esc_col_HyaA | 329 | LTALGVVAAAVGVHAVASAVDQRRRHNOQPTETEHQPGNEDKQA |          |                            |                                     | -----                                |   |                  |
| Esc_col_HybO | 331 | NVSAGAIIGLLGGVGLVAGVSMVAVRELGRQKKDNADSRGE    |          |                            |                                     | -----                                |   |                  |
| All_vin_HynS | 281 | AVVGGGLAALSRRKGRDAAATRPVT--VDELEQKL          |          |                            |                                     | -----                                |   |                  |
| Thi_ros_HynS | 336 | AIVGGAVAALAKKQTKTAVAHROPVT--VEELEAKL         |          |                            |                                     | -----                                |   |                  |
| Des_gig_HydA |     | -----                                        |          |                            |                                     | -----                                |   |                  |
| Des_vul_HydA |     | -----                                        |          |                            |                                     | -----                                |   |                  |
| Des_bac_HysS |     | -----                                        |          |                            |                                     | -----                                |   |                  |

**Figure S4** Amino acid sequence alignment of the small subunits of aerobic and anaerobic [NiFe] hydrogenases. The cysteine and histidine residues involved in coordination of the proximal (P), medial (M) and distal (D) iron-sulfur clusters are highlighted in red and green. Additional cysteine residues that are in close proximity to the proximal [4Fe4S] cluster are shown in green. The grey shaded signal sequences are cleaved off during the process of Tat-mediated membrane translocation. The blue regions are involved in the connection of the hydrogenase small subunit to

the membrane-integral cytochrome *b*. These amino acid stretches are absent in the periplasmic hydrogenases from *Desulfovibrio/Desulfomicrobium* species that interact with *c*-type cytochromes. Strain abbreviations (database accession numbers of the protein sequences are given in brackets): Ral\_eut, *Ralstonia eutropha* H16 (NP\_942643); Alc\_hyd, *Alcaligenes hydrogenophilus* M50 (P33375); Ral\_met, *Ralstonia metallidurans* CH34 (YP\_583452); Rho\_cap, *Rhodobacter capsulatus* (CAA31869); Rhi\_leg, *Rhizobium leguminosarum* (P18637); Bra\_jap, *Bradyrhizobium japonicum* (P12635); Thi\_ros, *Thiocapsa roseopersicina* (AAA27409); Aqu\_aeo, *Aquifex aeolicus* VF5 (NP\_213454); Esc\_col, *Escherichia coli* K12 (NP\_415491, BAE77058); All\_vin, *Allochromatium vinosum* (AAU93828); Des\_gig, *Desulfovibrio gigas* (P12943); Des\_vul, *Desulfovibrio vulgaris* 'Miyazaki F' (YP\_002434696); Des\_bac, *Desulfomicrobium baculatum* (P13063).
